# Supplementary material for: Microflowers formed by complexation-driven self-assembly between palladium(ii) and bis-theophyllines: immortal catalyst for C–C cross-coupling reactions
Source: Royal Society of Chemistry journal article supplement (doi:10.1039/d1ra06177a), 2021-01-01
Supplement: d1ra06177a1.pdf [file d1ra06177a1.pdf]

## Supporting Information

### 1. Experimental Procedures

#### 1-1. Synthesis of theophylline ligand

#### 1-2. Preparation of nanostructured palladium-theophylline flowers by complexation-driven self-assembly

#### 1-3. Suzuki-Miyaura cross-coupling reactions (Figure S1)

### 2. Results and Discussion

#### 2-1. Characterization data of products

BTC<sub>7</sub> :

NMR assays (Figure S2, S3)

BTC<sub>3</sub> ~ BTC<sub>8</sub>(except BTC<sub>7</sub>)

NMR assays (Figure S4-1 ~ Figure S12-2)

#### 2-2. Nanostructured palladium/theophylline complex (PdBTC<sub>7</sub>):

Elementary analysis (Table S1)

Diffuse reflectance UV-Vis spectroscopy (Figure S13)

FT-IR spectroscopy (Figure S14)

<sup>13</sup>C-CP/MAS NMR (Figure S15)

XPS spectra (Figure S16)

SEM images of the complexes PdBTC<sub>n</sub> (n = 3, 4, 5, 6, 7, 8, 9, 10,11, and 12) (Figure S17)

X-ray powder diffraction (XRD) measurements (Figures S18, S19)

#### 2-3. Catalysis of PdBTC<sub>n</sub> in Suzuki-Miyaura coupling reactions (Table S2)

#### 2-4. Recyclability tests of PdBTC<sub>7</sub> for the Suzuki-Miyaura coupling reactions (Figures S20-S23, Table S3)

#### 2-5. Hot filtrate test

### 3. References

## 1. Experimental Procedures

### 1-1. Synthesis of theophylline ligand

Ligand molecules containing theophylline as a chelate agent used in this study were prepared modifying literature procedure.[1] The *bis*-theophylline alkane were synthesized from the reaction between theophylline and alkyl-dibromide in the presence of potassium carbonate in methanol at 70 °C according to the following reaction(Eq. (1)).

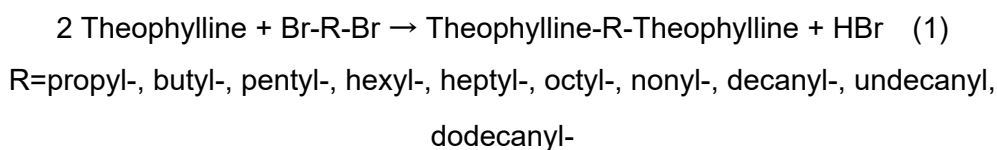

Typical example of synthesis of bisditheophyllineheptan(BTC<sub>7</sub>) was described as follows. To a 300 mL eggplant type flask equipped with a condenser, methanol (solvent, 200 mL), K<sub>2</sub>CO<sub>3</sub> (base, 3.46 g, 25 mmol), and theophylline (3.96 g, 22 mmol) were added, and the mixture was stirred at 70 °C until solution became clear. Then, dibromoheptane (C7: 2.63 g, 10 mmol) was added and the mixture was refluxed at 80 °C for 96 h. After that, the reaction mixture was evaporated to remove methanol. Then the product was extracted from chloroform/water. After concentration the chloroform solution, the product (BTC<sub>7</sub>) was recrystallized in ethyl acetate by which white powders were obtained.

### 1-2. Preparation of nanostructured palladium-theophylline flowers by complexation-driven self-assembly

Complexation of BTC<sub>7</sub> and palladium (II) chloride was performed from a water-ethanol mixture. The ethanol solution of BTC<sub>7</sub> (5.0 mmol dm<sup>-3</sup>) was prepared by dissolving 570 mg of BTC<sub>7</sub> into 250 mL of analytical grade ethanol. The aqueous solution of PdCl<sub>2</sub> (5.0 mmol dm<sup>-3</sup>) was prepared by dissolving palladium (II) chloride in 1.0 M hydrochloric acid. Then, equal volumes (250 mL) of both same concentration solutions were mixed and left 1 month. Yellow precipitates (PdBTC<sub>7</sub>) formed spontaneously were filtrated and washed by water and ethanol alternatively, and dried at ambient condition.

### 1-3. Suzuki-Miyaura cross-coupling reactions

In a typical reaction, 0.317 mg of PdBTC<sub>7</sub> (MW=633.83) (this equates to 0.1 mol% Pd relative to bromobenzene) was exactly weighed by precision balance (Sartorius cubis MSE6.6S-000-DM) and was put into a 6 cm<sup>3</sup> screw top tube. And then 0.6 mmol of phenylboronic acid (TCI) and 1.0 mmol of potassium carbonate (FUJIFILM Wako, for organic synthesis) were added. The screw top tube was filled with 5 cm<sup>3</sup> of water:ethanol (1:1 in volume) and sonicated for a short period of time (ca., 1-2 min). After addition of 0.5 mmol of 4-bromobenzene, the tube was then placed in a thermostatic water bath by cool pump to 20 °C, and stirred for 2h. Then the reaction mixture was transferred into a 100 cm<sup>3</sup> screw top tube by use of 20 cm<sup>3</sup> of water, then added 2 cm<sup>3</sup> of CDCl<sub>3</sub> (Eurisotop, 99.80% D, 0.03% TMS). The mixture was vigorously stirred and the CDCl<sub>3</sub> layer was dried over a small amount of Na<sub>2</sub>SO<sub>4</sub>. Then the solution of CDCl<sub>3</sub> was subjected to <sup>1</sup>H NMR to determine the yield. To check the reproducibility of the coupling reaction, we repeated the same reaction two times.

The following chart (Fig. S1) is an example of estimating the yield of biphenyl in the catalytic reaction for 30 min (see entry-11 in Table 1) by <sup>1</sup>H NMR.

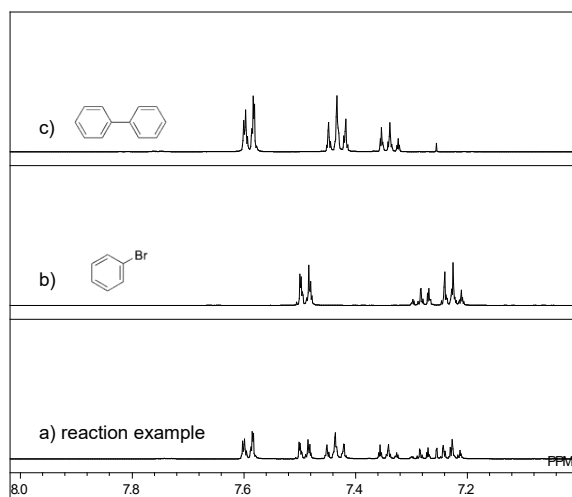

**Fig. S1.** <sup>1</sup>H NMR spectra of reaction mixture (a, reaction for 30 min), bromobenzene (b) and biphenyl (c) (CDCl<sub>3</sub>, 600 MHz). In the spectrum of (a), the yield of the biphenyl was

estimated from the integration ratio of two peaks around 7.585 ppm (2x2H, ortho-proton on biphenyl) and around 7.485 ppm (2H, ortho-proton on bromobenzene).

## 2. Results and Discussion

### 2-1. Characterization data of products

**BTC<sub>7</sub>** :

#### NMR assays

White powder. <sup>1</sup>H NMR (CDCl<sub>3</sub>, 600.17MHz, 298K): δ(ppm)=7.53 (s,2H, imidazole), 4.26 (t, J=7.8 Hz, 4H), 3.59 (s, 6H, N-CH<sub>3</sub>), 3.41 (s, 6H, N-CH<sub>3</sub>), 1.86 (m, 4H), 1.39 (m, 2H), 1.32 (m, 4H), <sup>13</sup>C NMR (CDCl<sub>3</sub>, 150.92MHz, 298K): δ(ppm)=155.0, 151.6, 148.9, 140.7, 106.9, 47.1, 30.7, 29.7, 28.3, 27.9, 26.1.

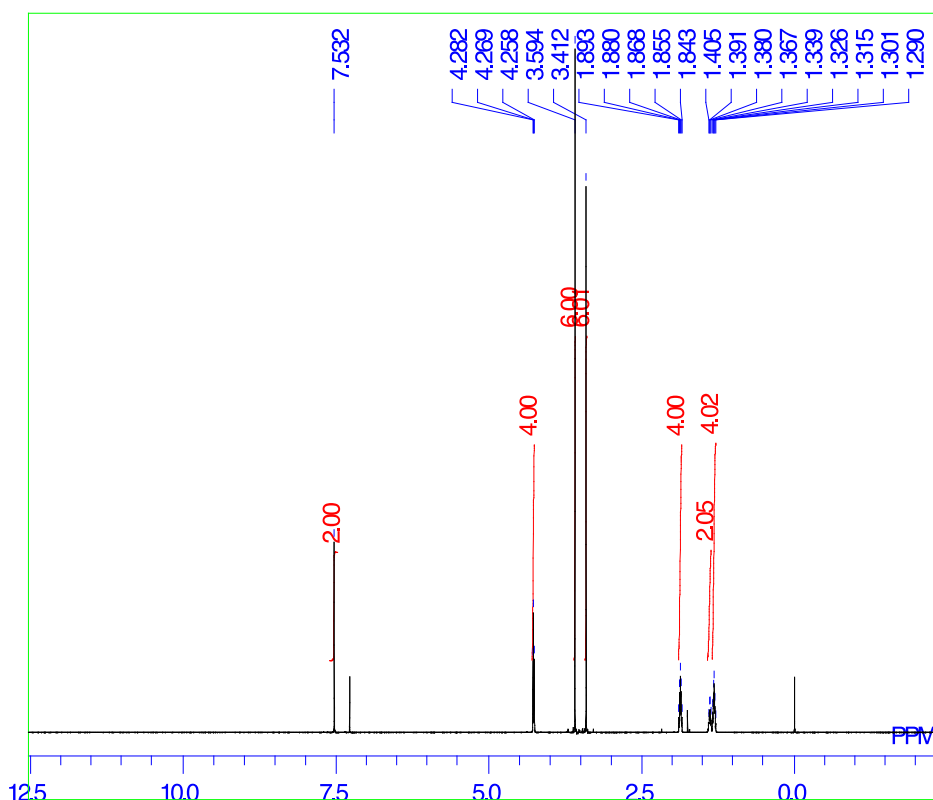

**Fig. S2.** <sup>1</sup>H NMR spectrum of BTC<sub>7</sub> (CDCl<sub>3</sub>, 600 MHz).

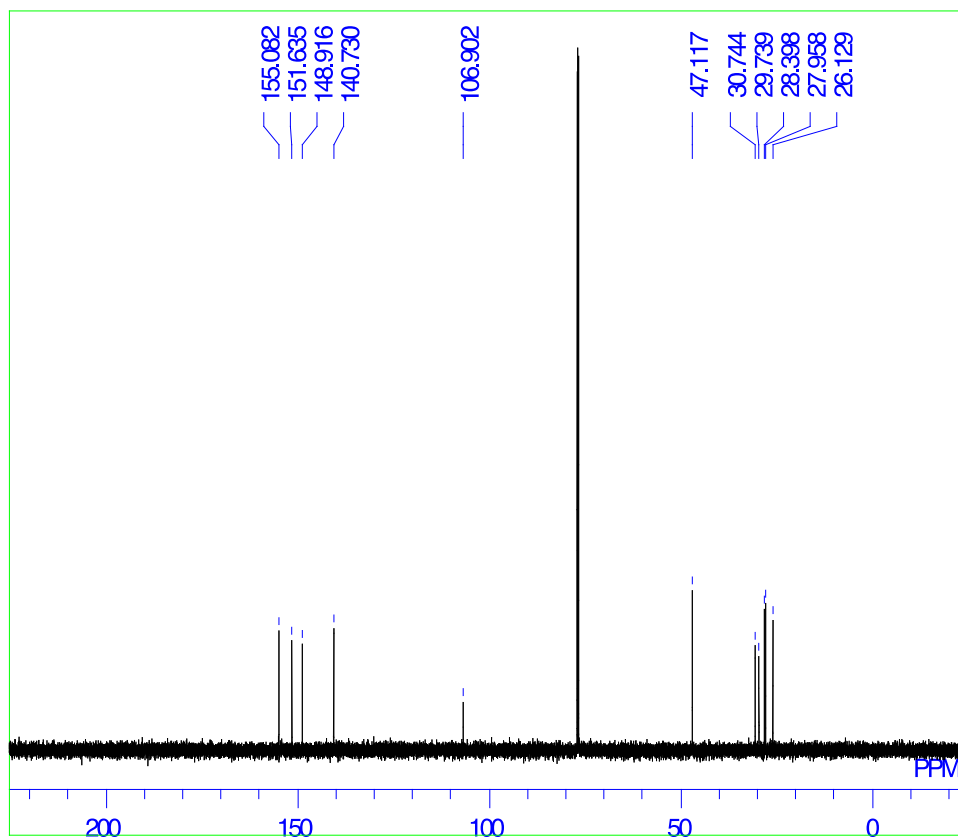

**Fig. S3.**  $^{13}\text{C}$  NMR spectrum of  $\text{BTC}_7$  ( $\text{CDCl}_3$ , 150 MHz).

BTC<sub>3</sub> : White powder. <sup>1</sup>H NMR (D<sub>2</sub>O/DCI=5:1 v/v, 600.17 MHz, 298K): δ(ppm)=7.35 (s,2H, imidazole), 2.87 (t, J=9.0 Hz, N-CH<sub>2</sub>, 4H), 1.79 (s, 6H, N-CH<sub>3</sub>), 1.52 (s, 6H, N-CH<sub>3</sub>), 0.85 (quint, J=9.0 Hz, -CH<sub>2</sub>, 2H), <sup>13</sup>C NMR (D<sub>2</sub>O/DCI=5:1 v/v, 150.92 MHz, 298K): δ(ppm)=153.9, 150.5, 140.3, 136.5, 106.3, 45.2, 31.1, 29.0.

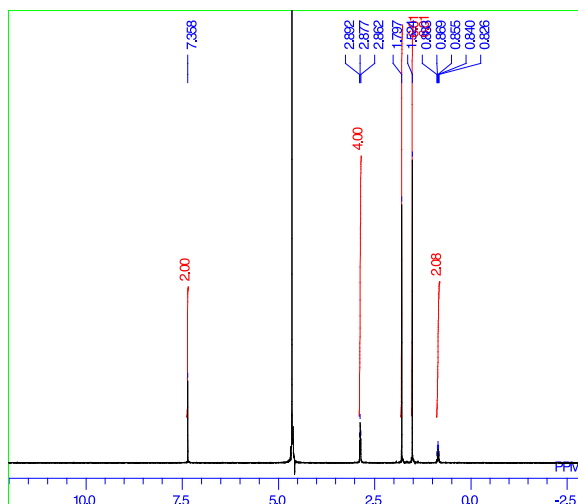

Fig. S4-1. <sup>1</sup>H NMR spectrum of BTC<sub>3</sub> (D<sub>2</sub>O/DCI, 600 MHz).

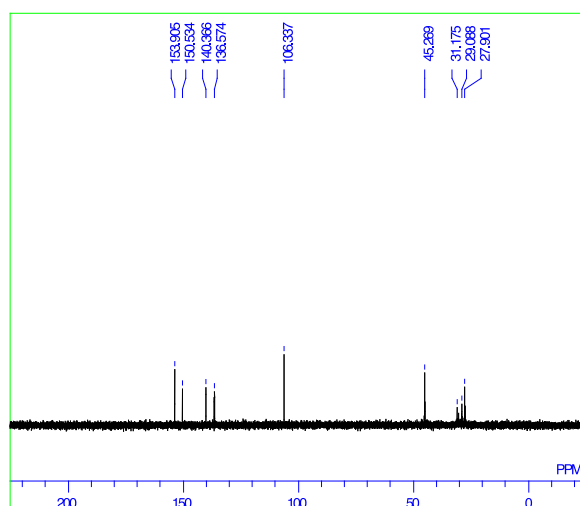

Fig. S4-2. <sup>13</sup>C NMR spectrum of BTC<sub>3</sub> (D<sub>2</sub>O/DCI, 150 MHz).

BTC<sub>4</sub> : White powder. <sup>1</sup>H NMR (CDCl<sub>3</sub>/CD<sub>3</sub>OD=5:1 v/v, 600.17 MHz, 298K): δ(ppm)=7.65 (s, 2H, imidazole), 4.34 (t, J=6.0 Hz, N-CH<sub>2</sub>, 4H), 3.58 (s, 6H, N-CH<sub>3</sub>), 3.41 (s, 6H, N-CH<sub>3</sub>), 1.92 (m, -CH<sub>2</sub>, 4H), <sup>13</sup>C NMR (CDCl<sub>3</sub>/CD<sub>3</sub>OD=5:1 v/v, 150.92 MHz, 298K): δ(ppm)=155.0, 151.5, 148.8, 141.2, 106.7, 46.1, 29.6, 27.9, 27.4.

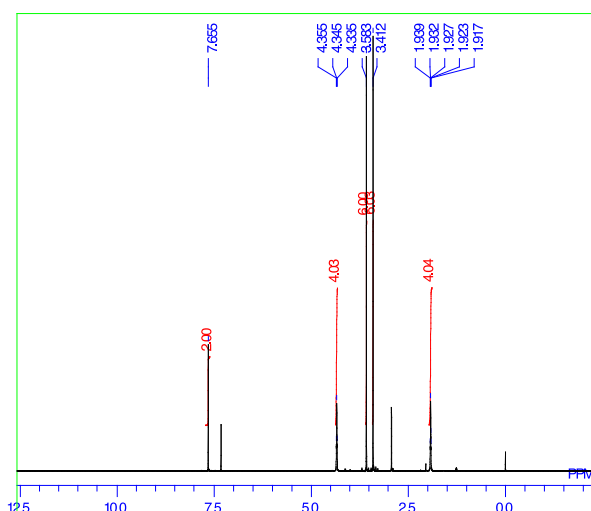

**Fig. S5-1.** <sup>1</sup>H NMR spectrum of BTC<sub>4</sub> (CDCl<sub>3</sub>/CD<sub>3</sub>OD, 600 MHz).

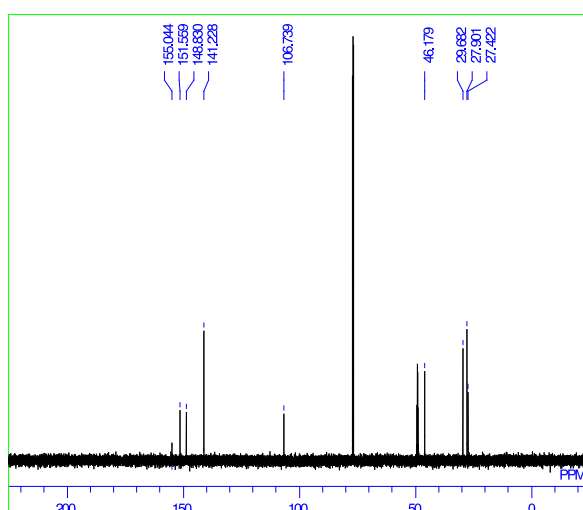

**Fig. S5-2.** <sup>13</sup>C NMR spectrum of BTC<sub>4</sub> (CDCl<sub>3</sub>/CD<sub>3</sub>OD, 150 MHz).

BTC<sub>5</sub> : White powder. <sup>1</sup>H NMR (CDCl<sub>3</sub>, 600.17 MHz, 298K): δ(ppm)=7.57 (s, 2H, imidazole), 4.28 (t, J=6.0 Hz, N-CH<sub>2</sub>, 4H), 3.59 (s, 6H, N-CH<sub>3</sub>), 3.41 (s, 6H, N-CH<sub>3</sub>), 1.95 (m, -CH<sub>2</sub>, 4H), 1.37 (m, -CH<sub>2</sub>, 2H), <sup>13</sup>C NMR (CDCl<sub>3</sub>, 150.92 MHz, 298K): δ(ppm)=155.0, 151.6, 148.9, 140.8, 106.8, 46.6, 30.1, 29.7, 27.9, 22.9.

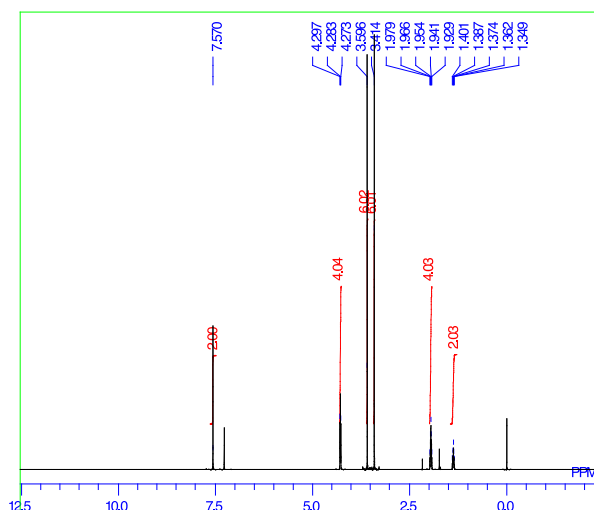

Fig. S6-1. <sup>1</sup>H NMR spectrum of BTC<sub>5</sub> (CDCl<sub>3</sub>, 600 MHz).

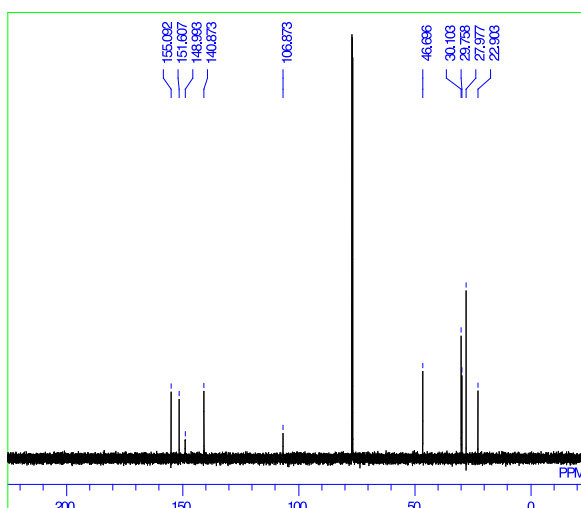

Fig. S6-2. <sup>13</sup>C NMR spectrum of BTC<sub>5</sub> (CDCl<sub>3</sub>, 150 MHz).



BTC<sub>6</sub> : White powder. <sup>1</sup>H NMR (CDCl<sub>3</sub>, 600.17 MHz, 298K): δ(ppm)=7.53 (s, 2H, imidazole), 4.27 (t, J=6.6 Hz, N-CH<sub>2</sub>, 4H), 3.59 (s, 6H, N-CH<sub>3</sub>), 3.40 (s, 6H, N-CH<sub>3</sub>), 1.88 (m, -CH<sub>2</sub>, 4H), 1.37 (m, -CH<sub>2</sub>, 4H), <sup>13</sup>C NMR (CDCl<sub>3</sub>, 150.92 MHz, 298K): δ(ppm)=155.0, 151.6, 148.9, 140.7, 106.8, 47.0, 30.6, 29.7, 27.9, 25.7.

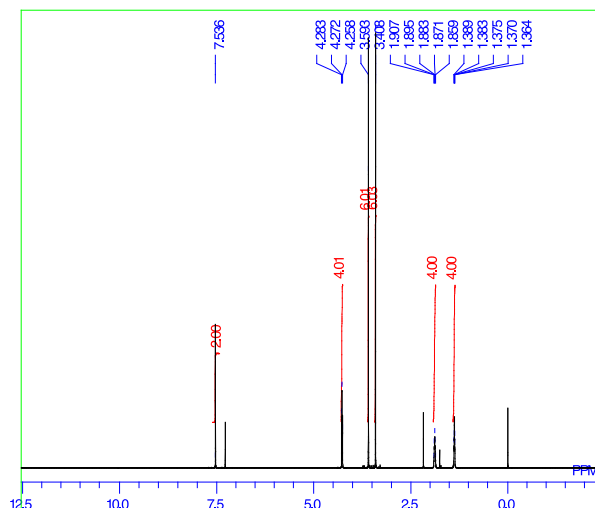

Fig. S7-1. <sup>1</sup>H NMR spectrum of BTC<sub>6</sub> (CDCl<sub>3</sub>, 600 MHz).

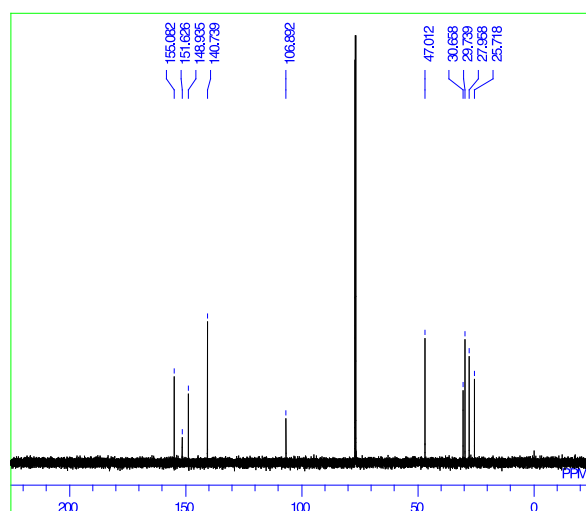

Fig. S7-2. <sup>13</sup>C NMR spectrum of BTC<sub>6</sub> (CDCl<sub>3</sub>, 150 MHz).

BTC<sub>8</sub> : White powder. <sup>1</sup>H NMR (CDCl<sub>3</sub>, 600.17 MHz, 298K): δ(ppm)=7.54 (s, 2H, imidazole), 4.27 (t, J=7.8 Hz, N-CH<sub>2</sub>, 4H), 3.59 (s, 6H, N-CH<sub>3</sub>), 3.41 (s, 6H, N-CH<sub>3</sub>), 1.86 (m, -CH<sub>2</sub>, 4H), 1.32 (m, -CH<sub>2</sub>, 8H), <sup>13</sup>C NMR (CDCl<sub>3</sub>, 150.92 MHz, 298K): δ(ppm)=155.0, 151.6, 148.9, 140.7, 106.9, 47.1, 30.7, 29.7, 28.7, 27.9, 26.1.

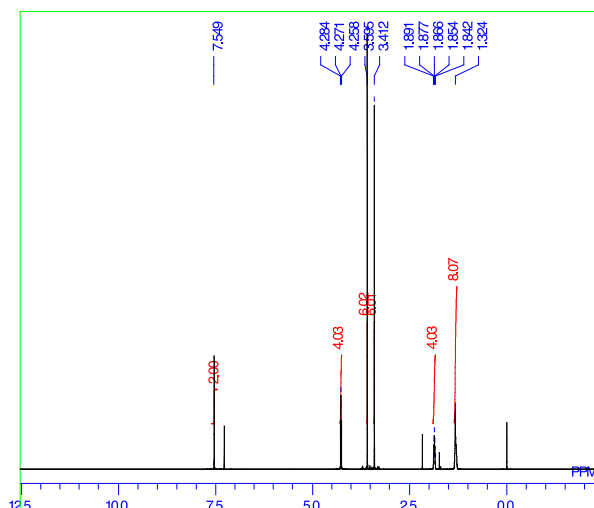

**Fig. S8-1.** <sup>1</sup>H NMR spectrum of BTC<sub>8</sub> (CDCl<sub>3</sub>, 600 MHz).

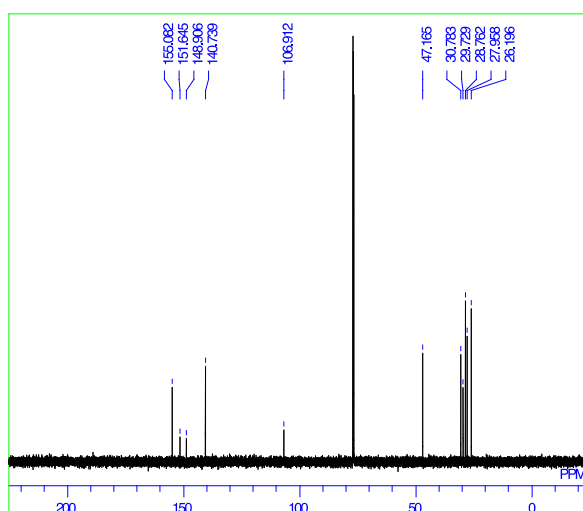

**Fig. S8-2.** <sup>13</sup>C NMR spectrum of BTC<sub>8</sub> (CDCl<sub>3</sub>, 150 MHz).

BTC<sub>9</sub> : White powder. <sup>1</sup>H NMR (CDCl<sub>3</sub>, 600.17 MHz, 298K): δ(ppm)=7.53 (s, 2H, imidazole), 4.27 (t, J=7.2 Hz, N-CH<sub>2</sub>, 4H), 3.59 (s, 6H, N-CH<sub>3</sub>), 3.41 (s, 6H, N-CH<sub>3</sub>), 1.86 (m, -CH<sub>2</sub>, 4H), 1.30 (m, -CH<sub>2</sub>, 10H), <sup>13</sup>C NMR (CDCl<sub>3</sub>, 150.92 MHz, 298K): δ(ppm)=155.0, 151.6, 148.8, 140.7, 106.9, 47.2, 30.8, 29.7, 29.1, 28.8, 27.9, 26.2.

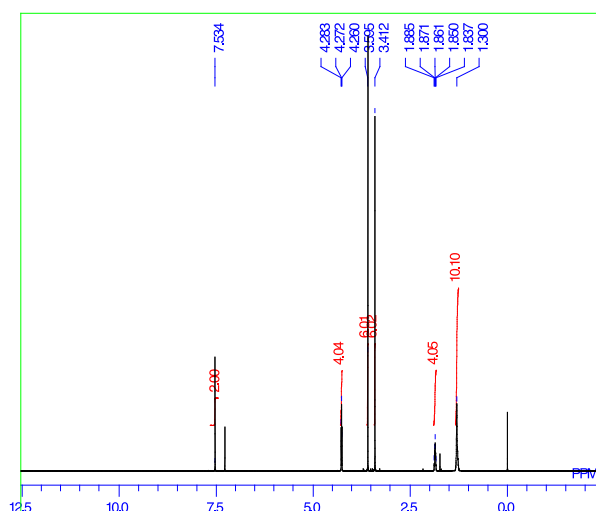

Fig. S9-1. <sup>1</sup>H NMR spectrum of BTC<sub>9</sub> (CDCl<sub>3</sub>, 600 MHz).

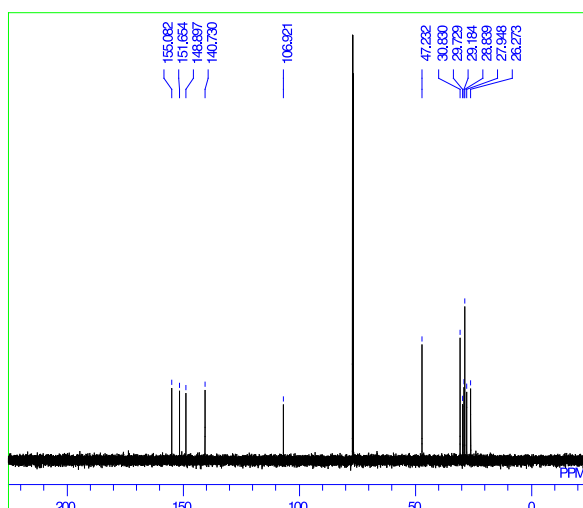

Fig. S9-2. <sup>13</sup>C NMR spectrum of BTC<sub>9</sub> (CDCl<sub>3</sub>, 150 MHz).

BTC<sub>10</sub> : White powder. <sup>1</sup>H NMR (CDCl<sub>3</sub>, 600.17 MHz, 298K): δ(ppm)=7.51 (s, 2H, imidazole), 4.27 (t, J=7.2 Hz, N-CH<sub>2</sub>, 4H), 3.59 (s, 6H, N-CH<sub>3</sub>), 3.41 (s, 6H, N-CH<sub>3</sub>), 1.86 (m, -CH<sub>2</sub>, 4H), 1.30-1.25 (m, -CH<sub>2</sub>, 12H), <sup>13</sup>C NMR (CDCl<sub>3</sub>, 150.92 MHz, 298K): δ(ppm)=155.0, 151.6, 148.8, 140.7, 106.9, 47.2, 30.8, 29.7, 29.2, 28.9, 27.9, 26.3.

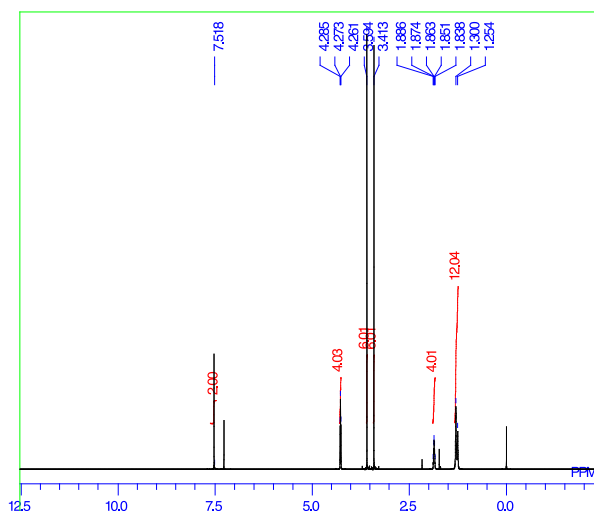

Fig. S10-1. <sup>1</sup>H NMR spectrum of BTC<sub>10</sub> (CDCl<sub>3</sub>, 600 MHz).

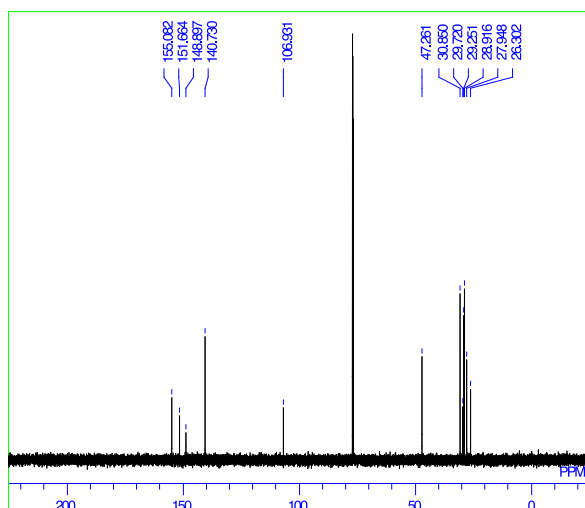

Fig. S10-2. <sup>13</sup>C NMR spectrum of BTC<sub>10</sub> (CDCl<sub>3</sub>, 150 MHz).

BTC<sub>11</sub> : White powder. <sup>1</sup>H NMR (CDCl<sub>3</sub>, 600.17 MHz, 298K): δ(ppm)=7.54 (s, 2H, imidazole), 4.28 (t, J=7.8 Hz, N-CH<sub>2</sub>, 4H), 3.60 (s, 6H, N-CH<sub>3</sub>), 3.42 (s, 6H, N-CH<sub>3</sub>), 1.87 (m, -CH<sub>2</sub>, 4H), 1.31-1.25 (m, -CH<sub>2</sub>, 14H), <sup>13</sup>C NMR (CDCl<sub>3</sub>, 150.92 MHz, 298K): δ(ppm)=155.1, 151.7, 148.9, 140.7, 106.9, 47.2, 30.8, 29.7, 29.3, 28.9, 27.9, 26.3.

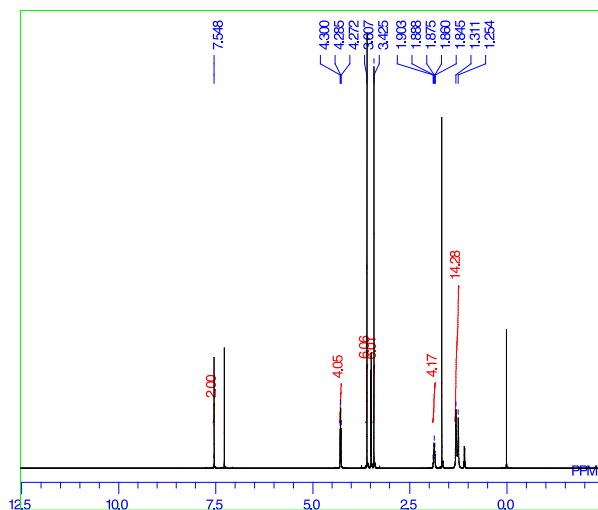

Fig. S11-1. <sup>1</sup>H NMR spectrum of BTC<sub>11</sub> (CDCl<sub>3</sub>, 600 MHz).

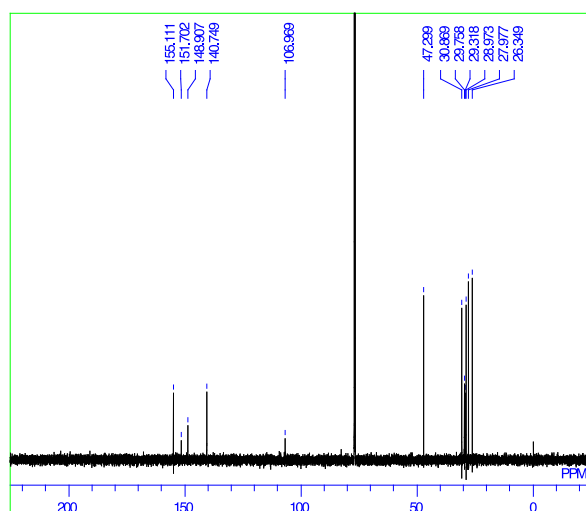

Fig. S11-2. <sup>13</sup>C NMR spectrum of BTC<sub>11</sub> (CDCl<sub>3</sub>, 150 MHz).

BTC<sub>12</sub> : White powder. <sup>1</sup>H NMR (CDCl<sub>3</sub>, 600.17 MHz, 298K): δ(ppm)=7.53 (s, 2H, imidazole), 4.27 (t, J=8.4 Hz, N-CH<sub>2</sub>, 4H), 3.59 (s, 6H, N-CH<sub>3</sub>), 3.41 (s, 6H, N-CH<sub>3</sub>), 1.86 (m, -CH<sub>2</sub>, 4H), 1.30-1.23 (m, -CH<sub>2</sub>, 16H), <sup>13</sup>C NMR (CDCl<sub>3</sub>, 150.92 MHz, 298K): δ(ppm)=155.0, 151.6, 148.8, 140.7, 106.9, 47.2, 30.8, 29.7, 29.3, 28.9, 27.9, 26.3.

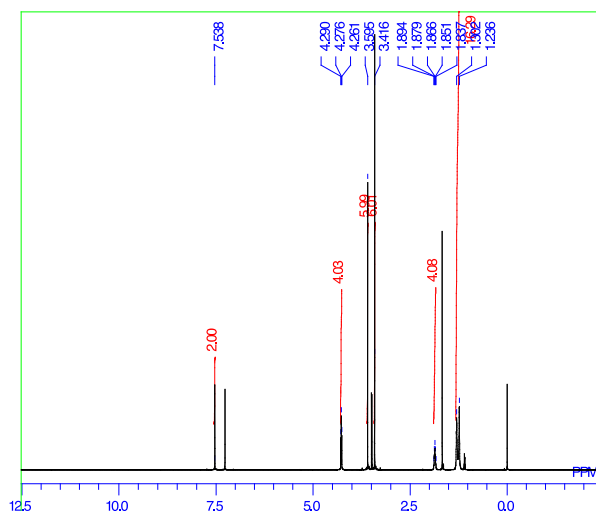

Fig. S12-1. <sup>1</sup>H NMR spectrum of BTC<sub>12</sub> (CDCl<sub>3</sub>, 600 MHz).

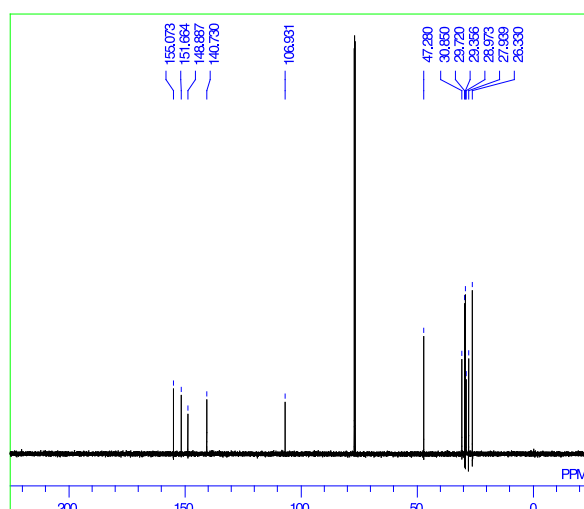

Fig. S12-2. <sup>13</sup>C NMR spectrum of BTC<sub>12</sub> (CDCl<sub>3</sub>, 150 MHz).

## 2-2. Nanostructured palladium/theophylline complex (PdBTC<sub>7</sub>):

### Elementary analysis

The component of PdBTC<sub>7</sub> was examined by elemental analysis and thermogravimetric analysis (TGA). PdBTC<sub>7</sub> (C<sub>21</sub>H<sub>28</sub>Cl<sub>2</sub>N<sub>8</sub>O<sub>4</sub>Pd): calcd (%): C 39.79; H 4.45; N 17.68. Found: C 39.53; H 4.73; N 17.78. The weight loss from TGA-curve in the temperature range from 100 to 800°C was assigned to the organic fraction and chloride. The residue was 16.48%, which is good agreement with the theoretical value of Pd content (16.79%).

**Table S1.** Components of PdBTC<sub>7</sub> determined by elementary analysis and TGA.

| Elements <sup>a, b</sup> | Calculated values (%) | Measured values (%) |
|--------------------------|-----------------------|---------------------|
| C                        | 39.79                 | 39.53               |
| H                        | 4.45                  | 4.73                |
| N                        | 17.68                 | 17.78               |
| Pd                       | 16.79                 | 16.48               |

[a] C, H, N contents were calculated by elemental analysis. [b] Pd content was determined by TG analysis.

### Diffuse reflectance UV-Vis spectroscopy

The complex flowers formed once from theophylline ligand ( $\text{BTC}_7$ ) and Pd(II) was insoluble in any solvents. So, we compared the powders of  $\text{BTC}_n$  and  $\text{PdBTC}_n$  by diffuse reflectance UV-VIS spectroscopy. The complex  $\text{PdBTC}_n$  showed new adsorption bands at 350 and 420 nm which are attributed to the chelate with Pd(II).

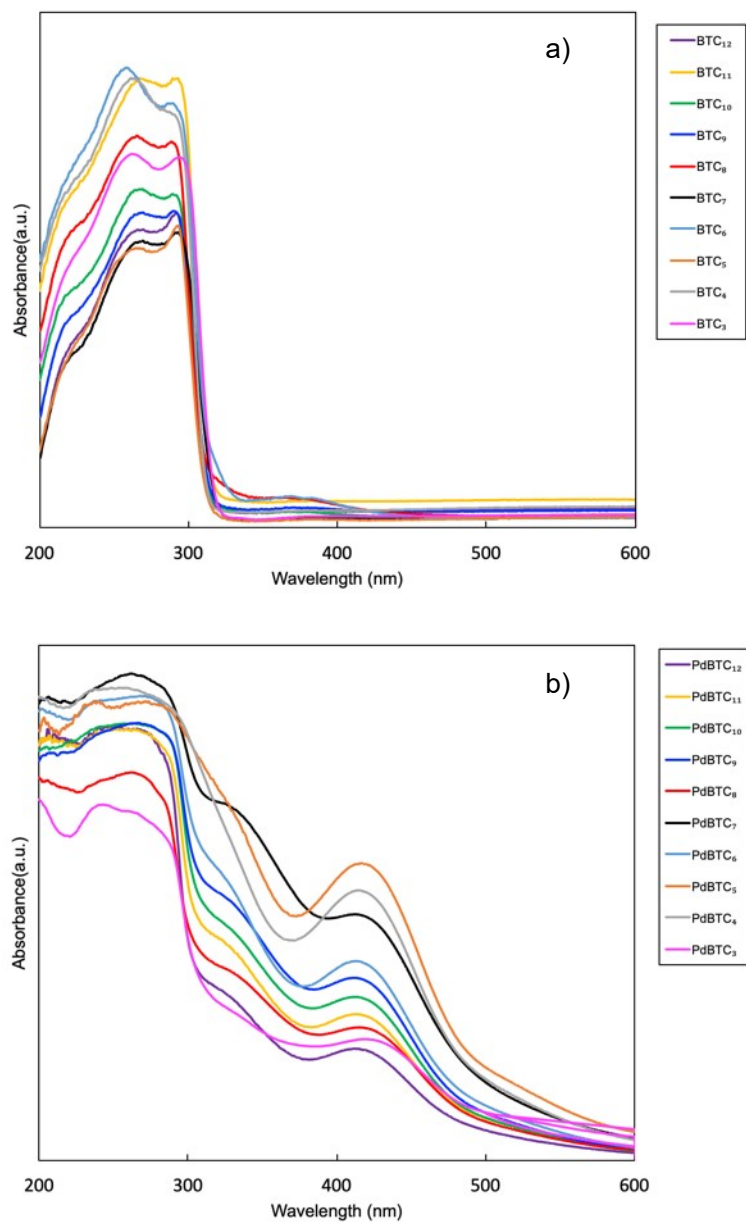

**Fig. S13.** Diffuse reflectance UV-Vis spectra of a)  $\text{BTC}_n$ , and b)  $\text{PdBTC}_n$ .



### FT-IR spectroscopy

a) BTC<sub>7</sub> : FT-IR (KBr)  $\nu$ C-H 3121, 2947 cm<sup>-1</sup>,  $\nu$ C=O 1703, 1659 cm<sup>-1</sup>, b) PdBTC<sub>7</sub> : FT-IR (KBr)  $\nu$ C-H 3090, 2927 cm<sup>-1</sup>,  $\nu$ C=O 1712, 1665 cm<sup>-1</sup>.

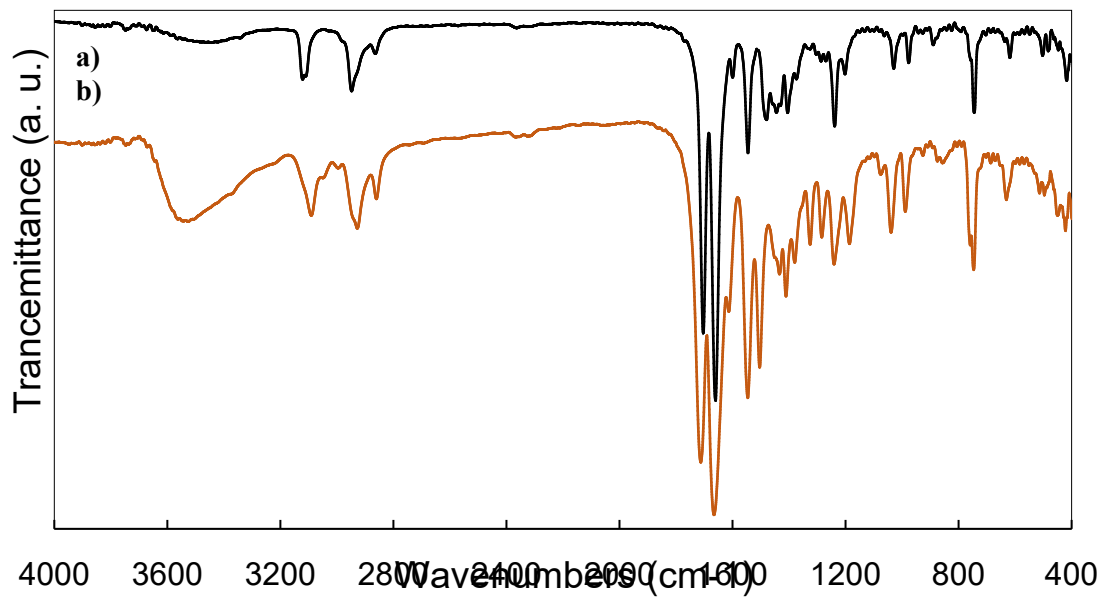

**Fig. S14.** FT-IR spectra of a) BTC<sub>7</sub> and b) PdBTC<sub>7</sub>.

### <sup>13</sup>C-CP/MAS NMR

BTC<sub>7</sub> : <sup>13</sup>C-CP/MAS NMR (100.53MHz, 298K): δ(ppm)=154.2, 149.6, 148.1, 144.6, 140.5, 105.7, 47.0, 32.6, 28.4, 23.6, 21.1, PdBTC<sub>7</sub> : <sup>13</sup>C-CP/MAS NMR (100.53MHz, 298K): δ(ppm)=153.7, 151.0, 147.3, 142.5, 108.2, 45.5, 33.2, 28.2, 23.3.

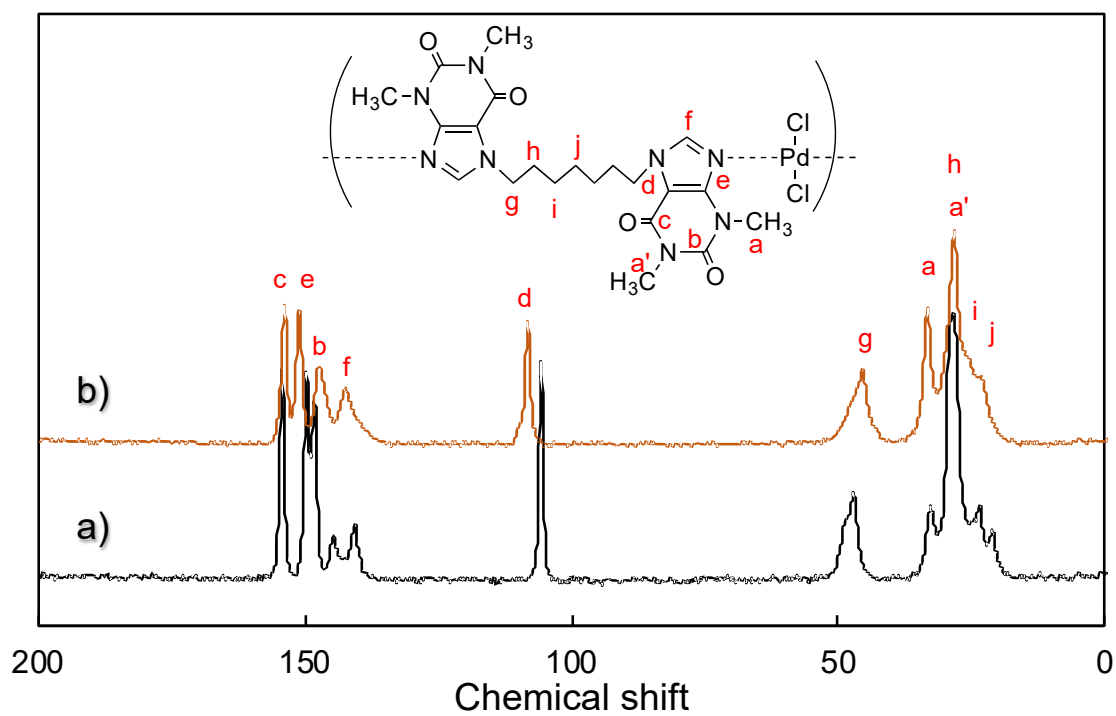

**Fig. S15.** Solid state <sup>13</sup>C-CP/MAS NMR (100.53 MHz) spectra of a) BTC<sub>7</sub> and b) PdBTC<sub>7</sub>.

## XPS spectra

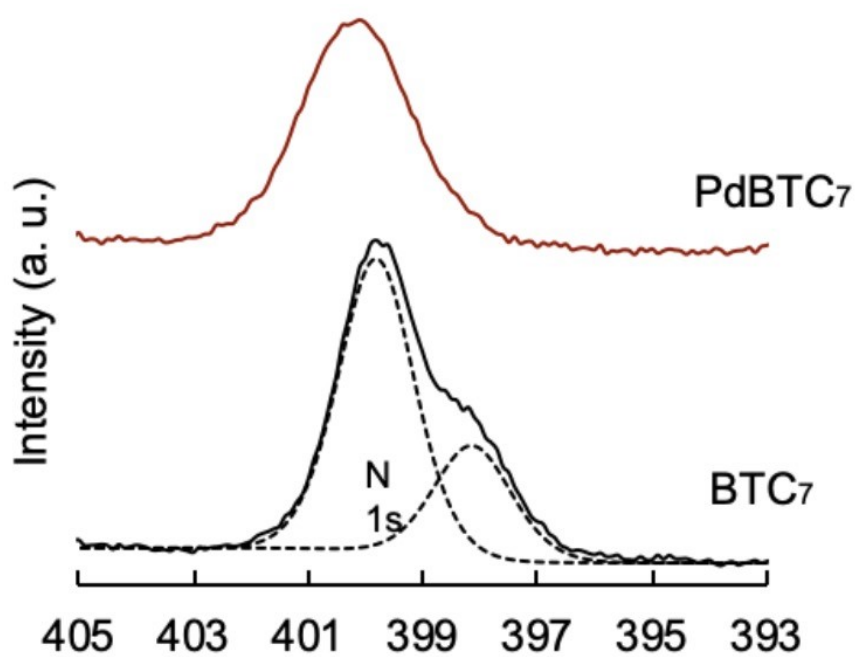

**Fig. S16.** High resolution XPS spectroscopy of N1s bonding energy of the ligand of  $\text{BTC}_7$  and the complex of  $\text{PdBTC}_7$ .

**SEM images of the complexes PdBTC<sub>n</sub> (n = 3, 4, 5, 6, 7, 8, 9, 10, 11 and 12)**

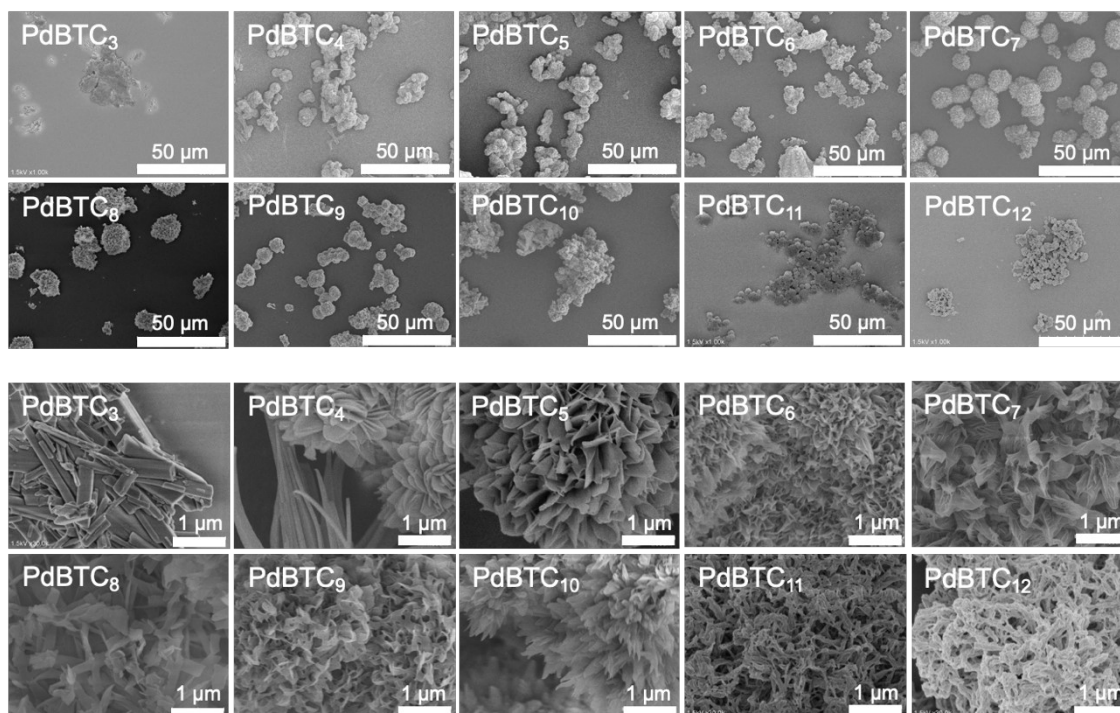

**Fig. S17.** SEM images of the complexes PdBTC<sub>n</sub> (n=3-12) obtained from the complexation-driven self-assembly in solution containing PdCl<sub>2</sub> and BTC<sub>n</sub>.

## X-ray powder diffraction (XRD) measurements

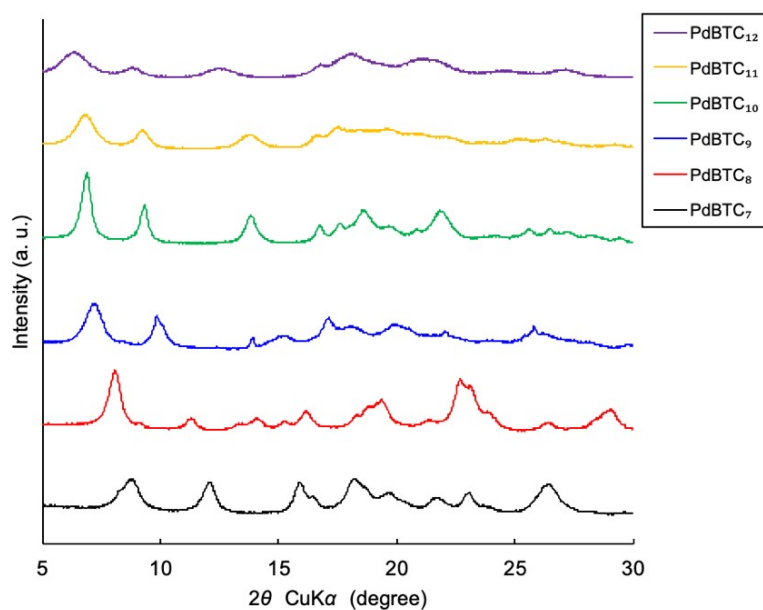

**Fig. S18.** XRD spectra of the as-prepared microflowers of PdBTC<sub>n</sub> (n=7-12). The peaks appeared in the smaller diffraction angle ( $2\theta < 10^\circ$ ) indicate that there are layered structures with long range period in the assemblies. This should be related to the arrangement of the alkyl chains (See Fig. S19).

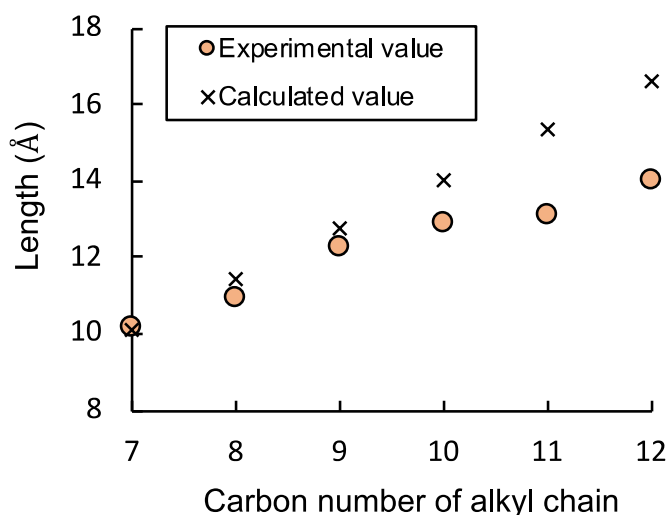

**Fig. S19.** Plot of the spacing data obtained from XRD of PdBTC<sub>n</sub> (n=7-12) (Figure S18, the diffraction peak in the smallest angle) and the calculated length of alkyl chains against to the carbon number of the alkyl chain. The spacing increases with increasing the length of alkyl chain. This relationship suggests that the petal-like nano ribbons on the micro-flowers were composed of layered structures where the alkyl chains fold along two-dimensions to form layered surface.

### 2-3. Catalysis of PdBTCn in Suzuki-Miyaura coupling reactions

**Table S2.** Catalytic activity of PdBTCn (n=3-12) in the coupling of bromobenzene with phenylboronic acid.<sup>[a]</sup>

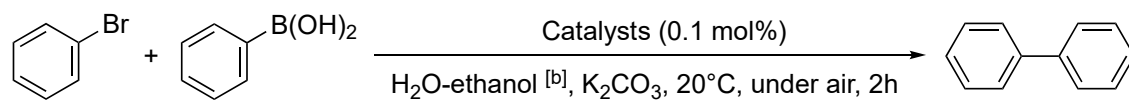

| Entry | Catalysts           | Yield <sup>[c]</sup> (%) |
|-------|---------------------|--------------------------|
| 1     | PdBTC <sub>3</sub>  | 97                       |
| 2     | PdBTC <sub>4</sub>  | 98                       |
| 3     | PdBTC <sub>5</sub>  | 98                       |
| 4     | PdBTC <sub>6</sub>  | 97                       |
| 5     | PdBTC <sub>7</sub>  | 98                       |
| 6     | PdBTC <sub>8</sub>  | 98                       |
| 7     | PdBTC <sub>9</sub>  | 98                       |
| 8     | PdBTC <sub>10</sub> | 98                       |
| 9     | PdBTC <sub>11</sub> | 98                       |
| 10    | PdBTC <sub>12</sub> | 98                       |

[a] Reaction conditions: aryl halides(0.5 mmol), phenylboronic acid (0.6 mmol), base (1.0 mmol), solvent (5.0 mL). [b] H<sub>2</sub>O:ethanol = 1:1. [c] Yields were determined by <sup>1</sup>H-NMR analysis.

#### 2-4. Recyclability tests of PdBTC<sub>7</sub> for the Suzuki-Miyaura coupling reaction

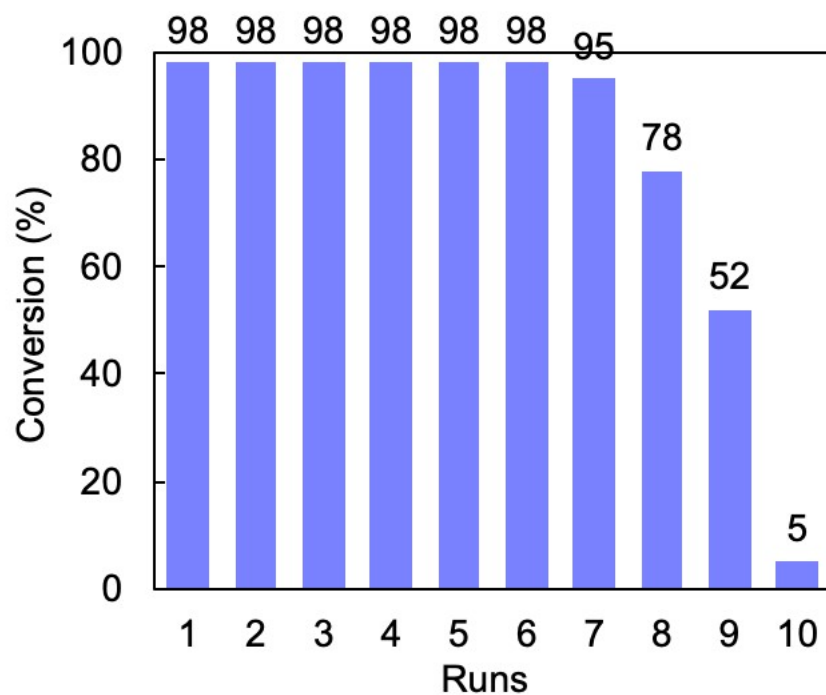

**Fig. S20.** Recyclability tests of PdBTC<sub>7</sub> for the coupling reaction of bromobenzene and phenylboronic acid. Reaction conditions: bromobenzene (0.5 mmol), phenylboronic acid (0.6 mmol), K<sub>2</sub>CO<sub>3</sub> (1.0 mmol), 1.0 mol% PdBTC<sub>7</sub>, solvent of H<sub>2</sub>O:ethanol = 1:1 (5.0 mL).

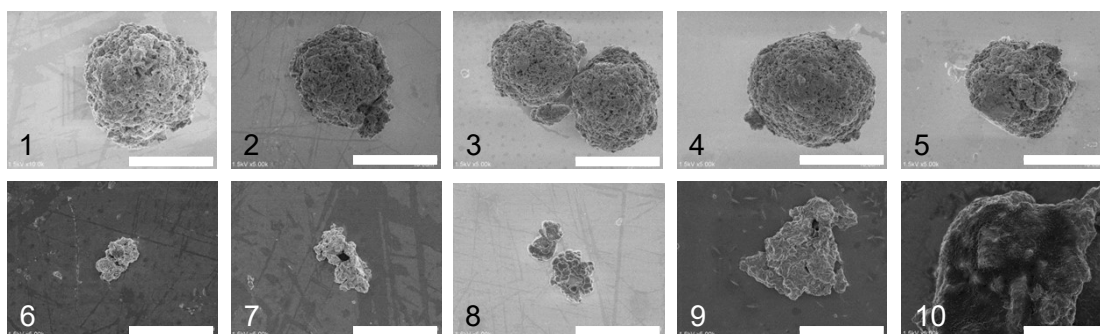

**Fig. S21.** SEM images of PdBTC<sub>7</sub> on the recyclability tests for the coupling reaction of bromobenzene and phenylboronic acid (scale bar : 10  $\mu$ m).

**Table S3.** Effect of the NaCl addition on the coupling of bromobenzene with phenylboronic acid.<sup>[a]</sup>

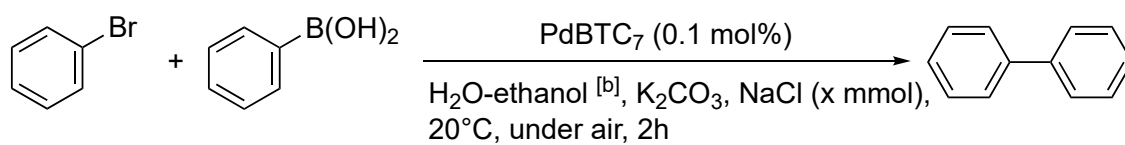

| Entry | NaCl (mmol) | Yield <sup>[c]</sup> (%) |
|-------|-------------|--------------------------|
| 1     | 0           | 98                       |
| 2     | 0.05        | 98                       |
| 3     | 0.5         | 98                       |
| 4     | 1.0         | 97                       |
| 5     | 2.0         | 96                       |
| 6     | 5.0         | 69                       |

[a] Reaction conditions: aryl halides(0.5 mmol), phenylboronic acid (0.6 mmol), base (1.0 mmol), solvent (5.0 mL). [b] H<sub>2</sub>O:ethanol = 1:1. [c] Yields were determined by <sup>1</sup>H-NMR analysis.



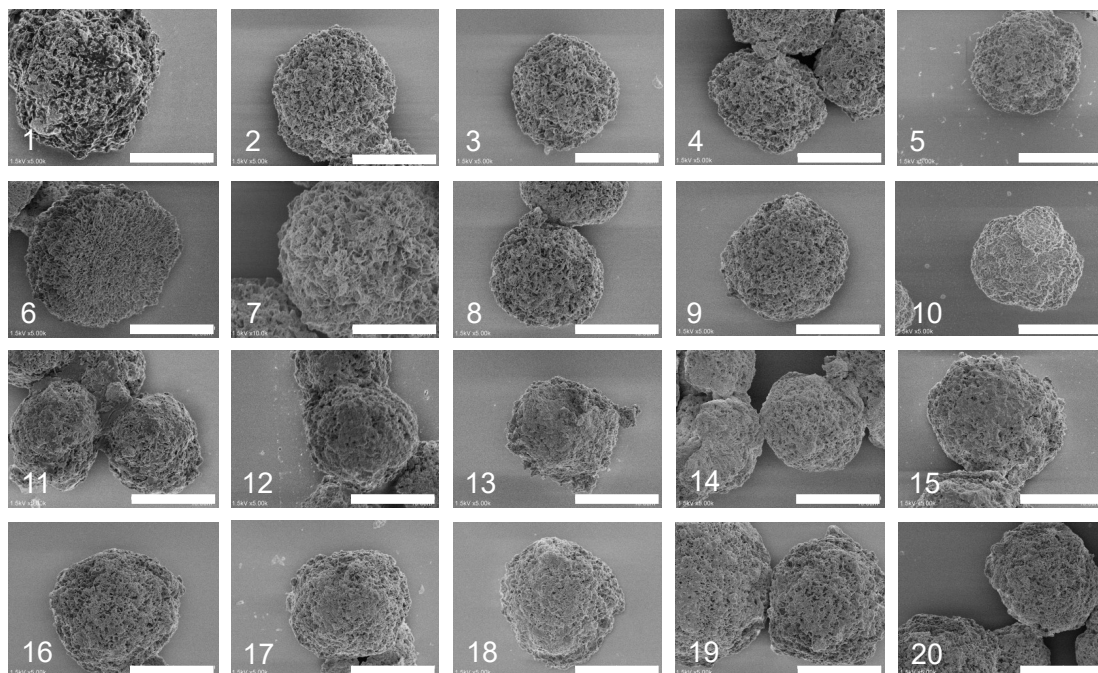

**Fig. S22.** SEM images of the powders of PdBTC<sub>7</sub> recovered from the recycle tests for the coupling reaction of bromobenzene and phenylboronic acid in the presence of NaCl (scale bar : 10 μm).

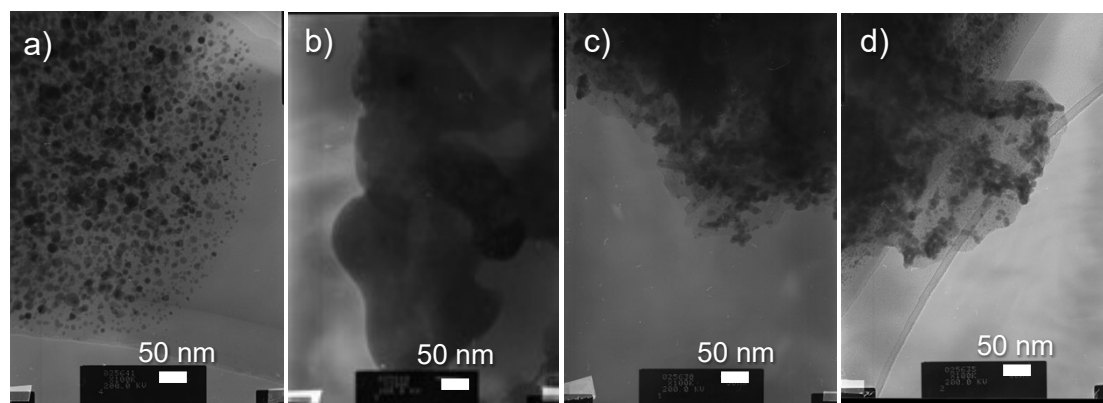

**Fig. S23.** TEM images of the powders of PdBTC<sub>7</sub> recovered from recycle tests in the presence or absence of NaCl for the coupling of bromobenzene and phenylboronic acid. a) PdBTC<sub>7</sub>, b) PdBTC<sub>7</sub> after tenth reaction without NaCl, c) PdBTC<sub>7</sub> after tenth reaction in the presence of NaCl, d) PdBTC<sub>7</sub> after twentieth reaction in the presence of NaCl.

### 2-5. Hot filtrate test

The study on the heterogeneity of PdBTC<sub>7</sub> was carried out by hot filtrate test.[2-4] After reaction (Table 1, entry 21), the catalyst was filtrated off by membrane filter. To the filtrate, *p*-bromotoluene, phenylboronic acid and K<sub>2</sub>CO<sub>3</sub> were added and this mixture was stirred at 50°C for 2 h. But no *p*-phenyltoluene was identified. This suggested that no leaching of the palladium species from PdBTC<sub>7</sub>.

### 3. References

- [1] K. Kaikake, Y. Baba, *Anal. Sci.*, **2001**, *17*, 411-415
- [2] Z.-L. Du, Q.-Q. Dang, X.-M. Zhang, *Ind. Eng. Chem. Res.* **2017**, *56*, 4275-4280
- [3] L.-X. You, L.-X. Cui, B.-B. Zhao, G. X., F. Ding, B.-Y. Ren, Z.-L. Shi, I. Dragutan, V. Dragutan, Y.-G. Sun, *Dalton Trans.* **2018**, *47*, 8755-8763.
- [4] Y. M. A. Yamada, S. M. Sarkar, Y. Uozumi, *J. Am. Chem. Soc.* **2012**, *134*, 3190-3198
